# Supplementary material
Source: PubMed Central journal article supplement (PMC5910266)

# Goodness of Fit Plots for MPAG

### Individual predictions versus concentrations

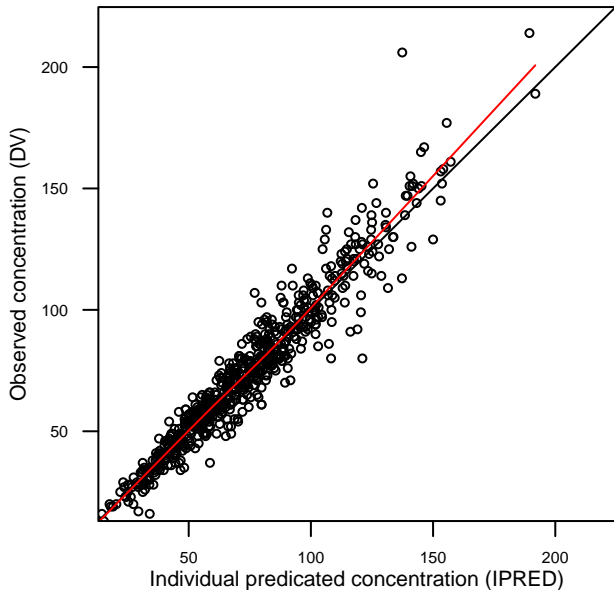

### Population predictions versus concentrations

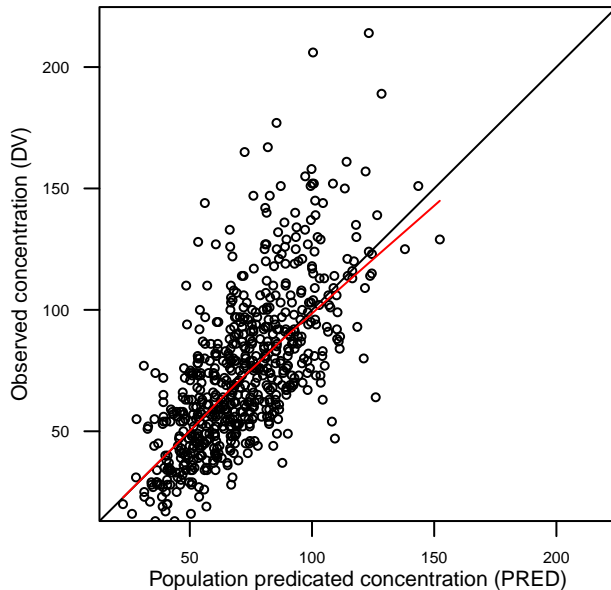

### Conditional weighted residuals versus population predictions

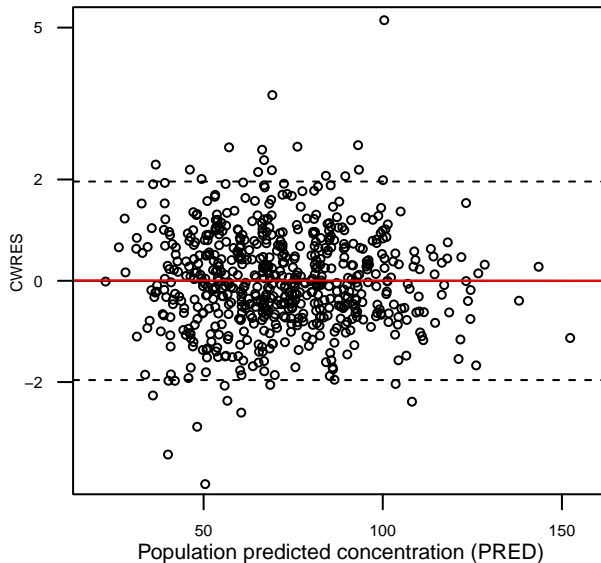

### Conditional weighted residuals versus time

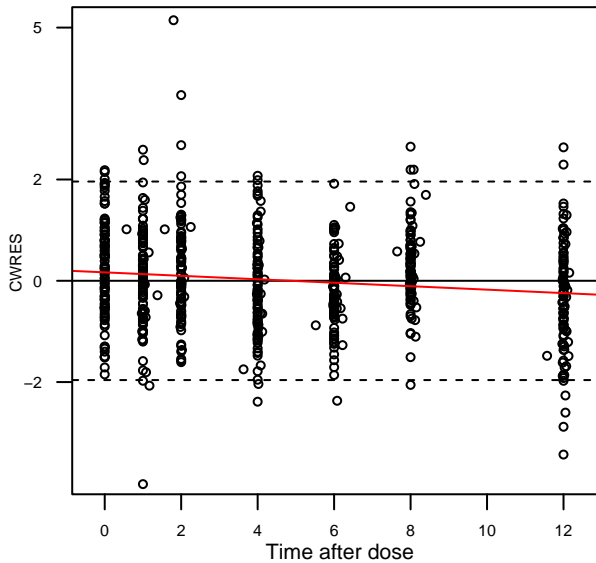

Supplement: NIHMS922517-supplement-Supp_FigS3.pdf [file NIHMS922517-supplement-Supp_FigS3.pdf]
