# Supplementary material
Source: PubMed Central journal article supplement (PMC5910266)

# Goodness of Fit Plots for Acyl-MPAG

## Individual predictions versus concentrations

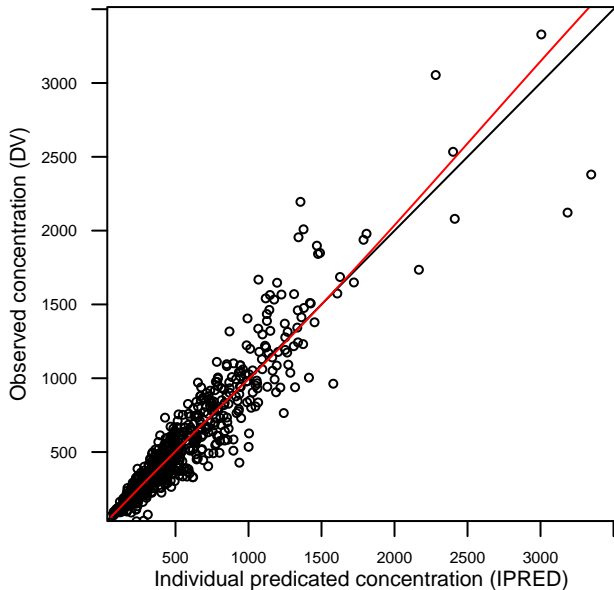

## Population predictions versus concentrations

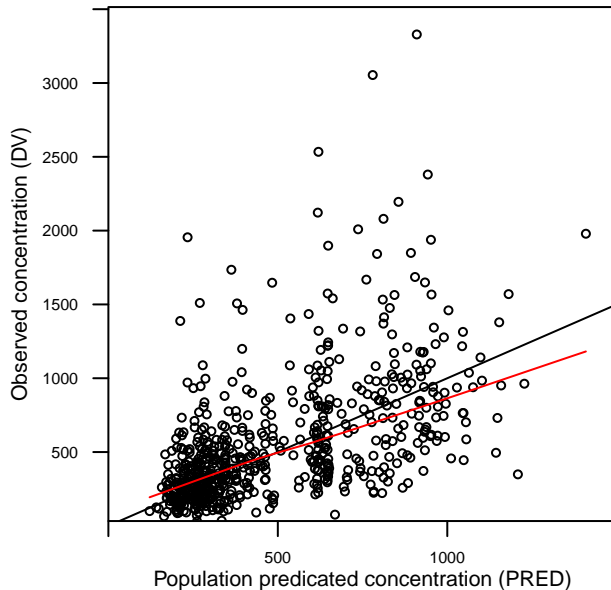

## Conditional weighted residuals versus population predictions

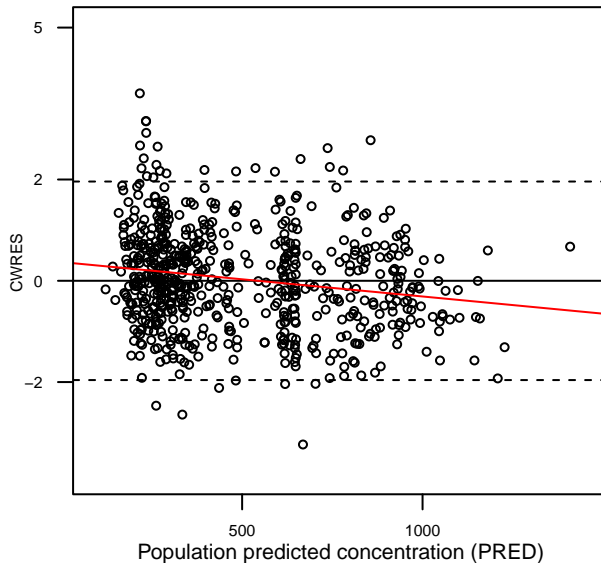

## Conditional weighted residuals versus time

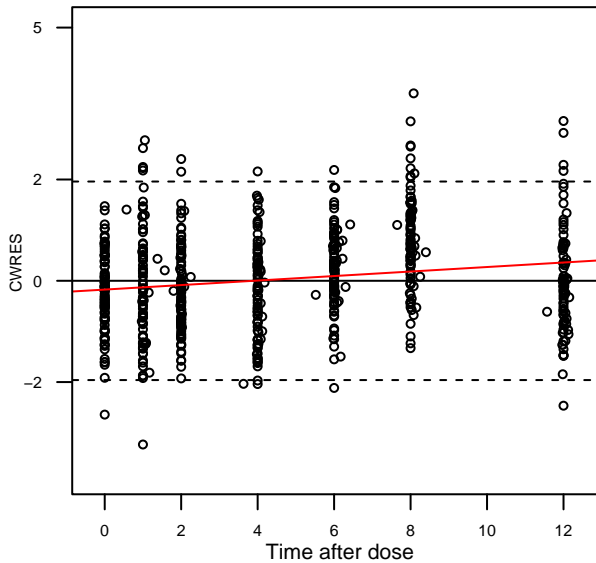

Supplement: NIHMS922517-supplement-Supp_FigS4.pdf [file NIHMS922517-supplement-Supp_FigS4.pdf]
